# Supplementary material
Source: Springer Nature journal article supplement (https://www.springermedizin.de/resource/supplementary/13030_2007_13_MOESM3_ESM.pdf/9644546)

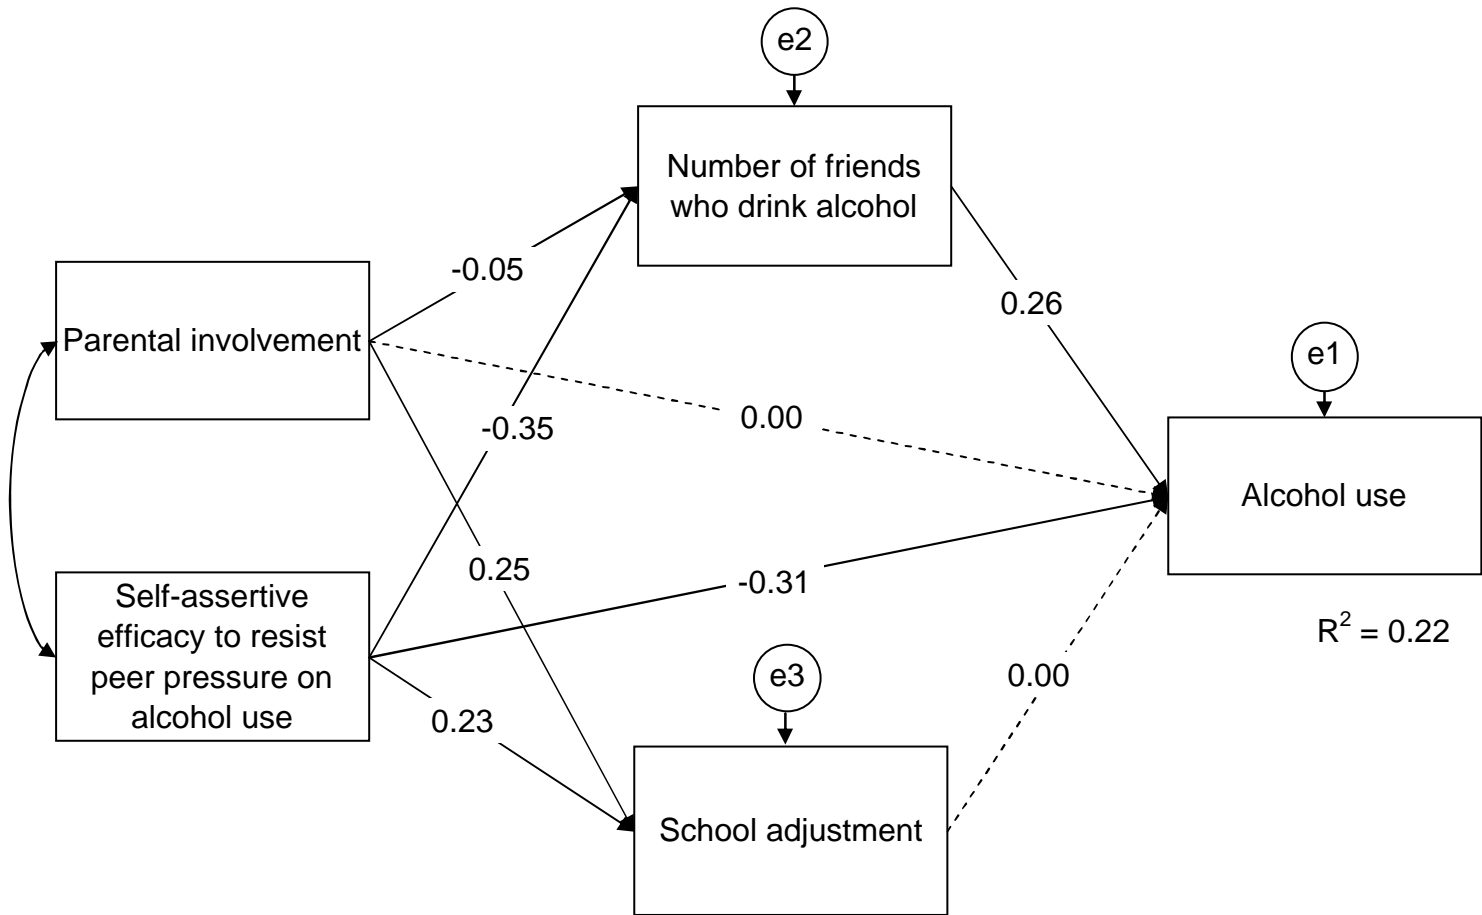

Supplement: MOESM3 [file 9644546]
